# Supplementary material for: Design of Beta-2 Microglobulin Adsorbent Protein Nanoparticles
Source: MDPI journal article supplement (doi:10.3390/biom13071122), 2023-07-14
Supplement: s1 [file s1]

## Design of Beta-2 Microglobulin Adsorbent Protein Cages

Justin E. Miller, et al.

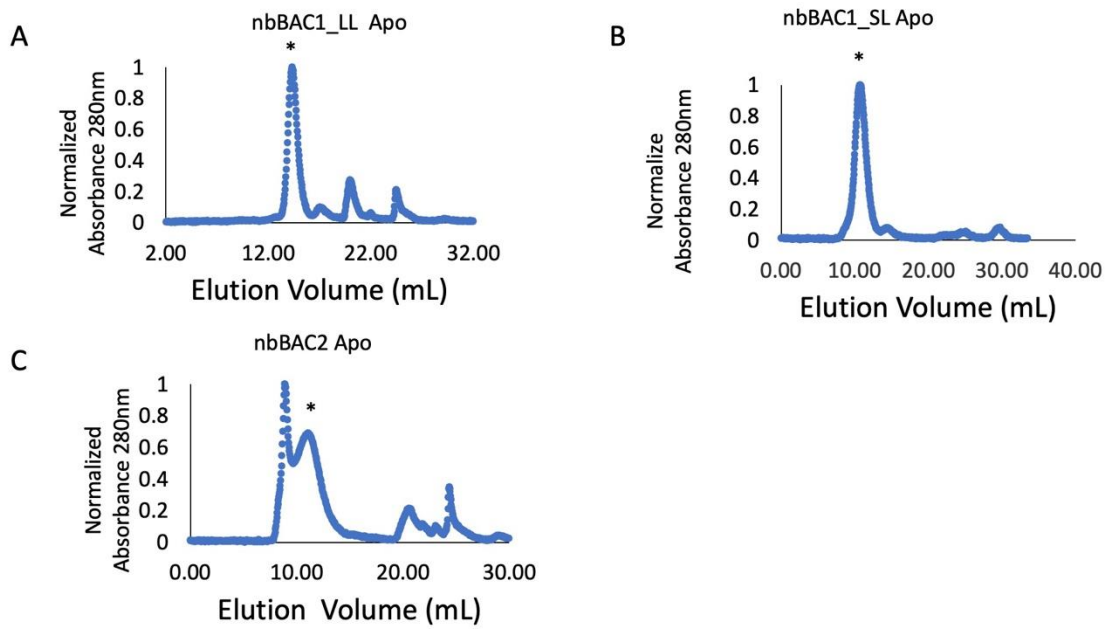

**Supplemental Data Figure 1.** SEC elution profiles of BAC nanoparticles. SEC chromatograms for nbBAC1\_LL (A), nbBAC1\_SL (B), and nbBAC2\_SL (C). Assembled BAC nanoparticles are denoted with asterisks.

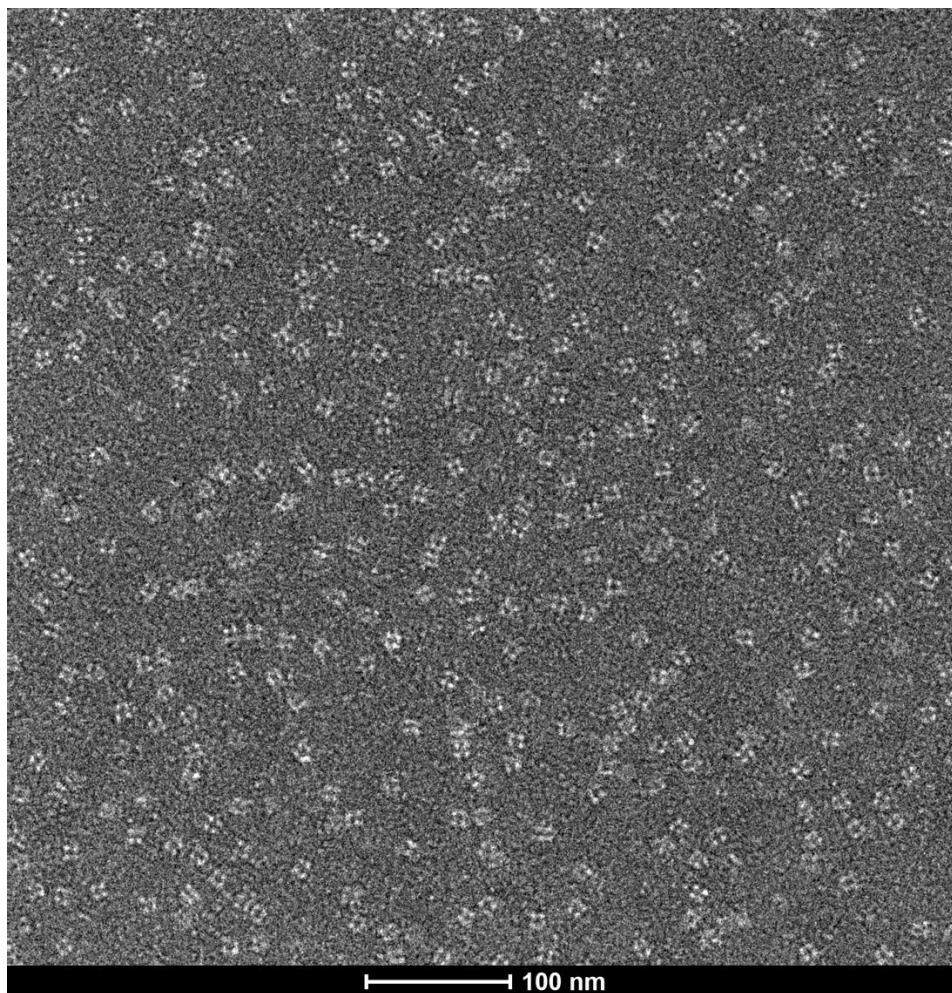

**Supplemental Data Figure 2.** Negatively stained TEM image of nbBAC1\_LL mixed with B2M cargo at a ratio of 2:1 (B2M:cage).

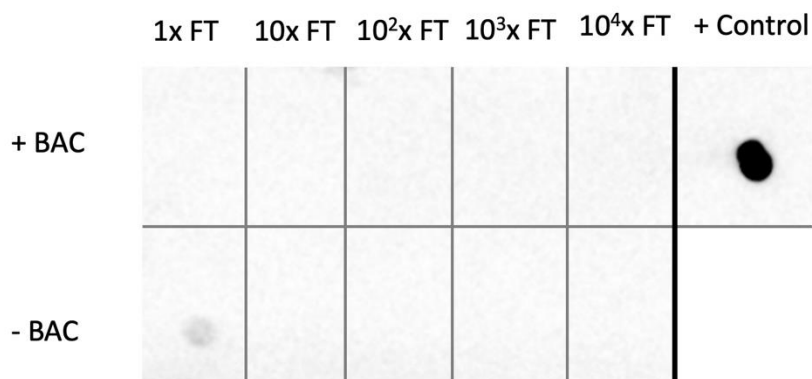

**Supplemental Data Figure 3.** Immunoblot analysis of flowthrough from the B2M retention assay. Serial dilutions of flow through from the size-filtration retention assay either with (top) or without (bottom) nbBAC1\_LL added to supernatant were analyzed for B2M via immunoblot. A positive control (1uM B2M) is depicted in top right.

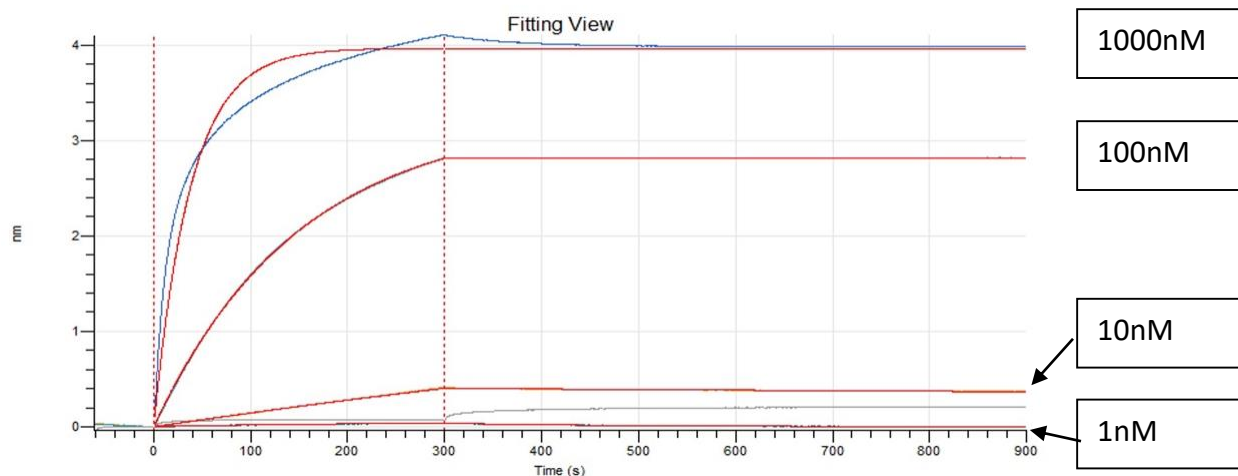

**Supplemental Data Figure 4.** Measurement of binding affinity of B2M to nbBAC1\_LL. Biolayer interferometry was used to estimate the equilibrium dissociation constant of nbBAC for B2M. Based on experiments with BAC concentrations between 1 nM and 100 nM, the estimated Kd value is 4.2 nM (+/- 8 nM). Curves corresponding to BAC concentrations of 1000nM, 100nM, 10nM, and 1nM are shown.

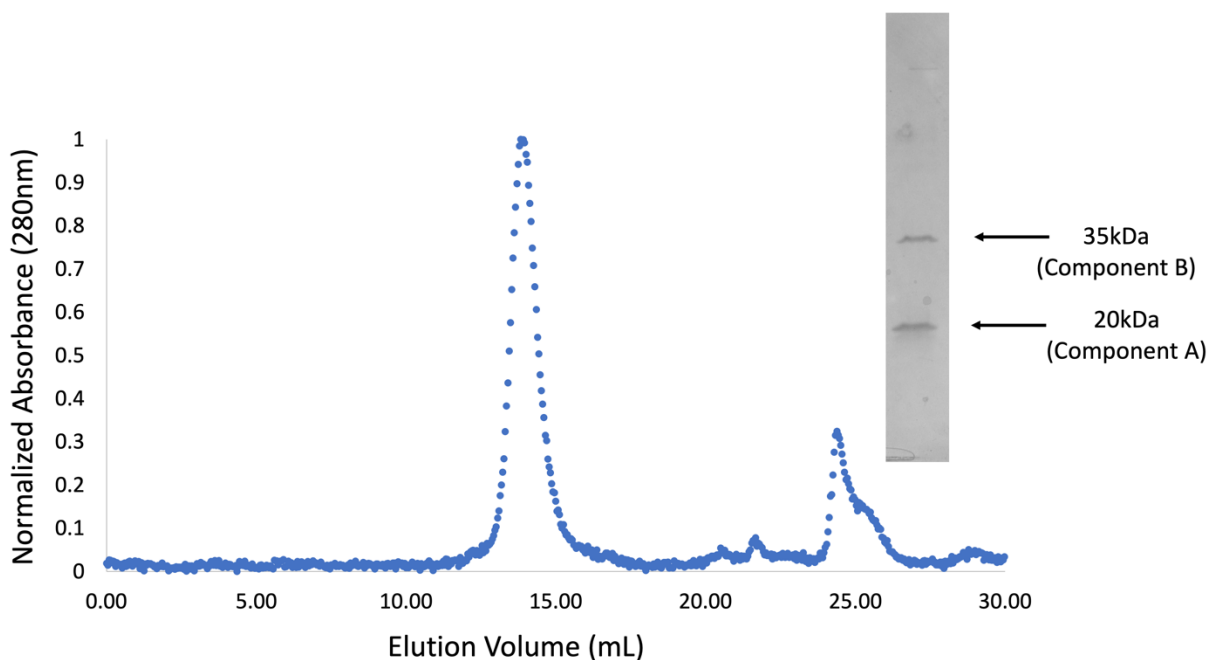

**Supplemental Data figure 5.** nbBAC1\_LL is stable in human serum. nbBAC1\_LL incubated in serum is purified and analyzed by SDS-PAGE and by SEC using Superose-6 column indicating nbBAC1\_LL maintains correct assembly geometry in dialysis conditions.

|                  |                                                                                                                                                                                                                                                                                                                                                                                                                                                                                                                                                                                                                                        |
|------------------|----------------------------------------------------------------------------------------------------------------------------------------------------------------------------------------------------------------------------------------------------------------------------------------------------------------------------------------------------------------------------------------------------------------------------------------------------------------------------------------------------------------------------------------------------------------------------------------------------------------------------------------|
| <b>nbBAC1_SL</b> | <p>&gt;A component<br/> MFTRRGDQGETDLANRARVGKDSPVVEVQGTIDELNSFIGYALVLSR<br/> WDDIRNDLFRIQNDLFVLGEDVSTGGKGRTVTMDMIIYLIKRSVEMKA<br/> EIGKIELFVVPGGSVESASLHMARAVSRRLEERRIKAASELTEINANVLL<br/> YANMLSNILFMHALISNKRLNIPEKIWSIHRVSLE</p> <p>&gt;B component<br/> MRITTKVGDKGSTRLFGGEEVWKDDPIIEANGTDELTSFIGEAKHYV<br/> DEEMKGILEEIQNDIYKIMGEIGSKGKIEGISEERIKWLAGLIERYSEMV<br/> NKLSFVLPGGTLES AKLDVCRTIARRAERKVATVLRREFGIGTLAAIYLA<br/> LLSRLLFLLARVIEIEKNKLKEVRS GGSQVQLQESGGGSVQAGGSLRL<br/> SCAASGYTDSRYCMAWFRQAPGKEREWVARINSGRDITYYADSVKG<br/> RFTFSQDNAKNTVYLQMDSLEPEDTATYYCATDIPLRCRDIVAKGGD<br/> GFRYWGGGTQVTVSSHHHHHH</p>             |
| <b>nbBAC1_LL</b> | <p>&gt;A component<br/> MFTRRGDQGETDLANRARVGKDSPVVEVQGTIDELNSFIGYALVLSR<br/> WDDIRNDLFRIQNDLFVLGEDVSTGGKGRTVTMDMIIYLIKRSVEMKA<br/> EIGKIELFVVPGGSVESASLHMARAVSRRLEERRIKAASELTEINANVLL<br/> YANMLSNILFMHALISNKRLNIPEKIWSIHRVSLE</p> <p>&gt;B component<br/> MRITTKVGDKGSTRLFGGEEVWKDDPIIEANGTDELTSFIGEAKHYV<br/> DEEMKGILEEIQNDIYKIMGEIGSKGKIEGISEERIKWLAGLIERYSEMV<br/> NKLSFVLPGGTLES AKLDVCRTIARRAERKVATVLRREFGIGTLAAIYLA<br/> LLSRLLFLLARVIEIEKNKLKEVRS GGS GGS GGS GGSQVQLQESGGG<br/> SVQAGGSLRLSCAASGYTDSRYCMAWFRQAPGKEREWVARINSGR<br/> DITYYADSVKGRFTFSQDNAKNTVYLQMDSLEPEDTATYYCATDIPLR<br/> CRDIVAKGGDGFRYWGGGTQVTVSSHHHHHH</p> |
| <b>nbBAC2</b>    | <p>&gt;A component<br/> MKMEELFKKHKIVAVLRANSVEEAIEKAVAVFAGGVHLIEITFTVPDAD<br/> TVIKALSVLKEKGAIIGAGTVTSVEQCRKAVESGAEFIVSPHLDEEISQF<br/> CKEKGVFYMPGVMTPTELVKAMKLGHDKLFPGEVVGPPQFVKAMK<br/> GPPFNVKFVPTGGVNLDNVCKWFKAGVLAVGVGKALVKGKPDEVRE<br/> KAKKFVKKIRGCTE</p> <p>&gt;B component<br/> MNQHSKDHETVRIAVVRARWHAEIVDACVSAFEAAMRDIGGDRFA<br/> VDVFDVPGAYEIP LHARTLAETGRYGAVLGTAFV VNGGIYRHEFVASA<br/> VINGMMNVQLNTGVPVLSAVLTPHNYDKSKAHTLLFLALFAVKGMEA<br/> ARACVEILAAREKIAAGSGSGSGSGSGSQVQLQESGGGSVQAGGSLR<br/> LSCAASGYTDSRYCMAWFRQAPGKEREWVARINSGRDITYYADSVK</p>                                                                       |

|                |                                                                                                                                                                                                                                                                                                                                                                                                                                                                                                                                                                                                         |
|----------------|---------------------------------------------------------------------------------------------------------------------------------------------------------------------------------------------------------------------------------------------------------------------------------------------------------------------------------------------------------------------------------------------------------------------------------------------------------------------------------------------------------------------------------------------------------------------------------------------------------|
|                | GRFTFSQDNAKNTVYLQMDSLEPEDTATYYCATDIPLRCRDIVAKGG<br>DGFRYWGGGTQVTVSSAHHSEDPHHHHHH                                                                                                                                                                                                                                                                                                                                                                                                                                                                                                                        |
| <b>nbBAC2N</b> | >A component<br>MKMEELFKKHKIVAVLRANSVEEAIEKAVAVFAGGVHLIEITFTVPDAD<br>TVIKALSVLKEKGAIIGAGTVTSVEQCRKAVESGAEFIVSPHLDEEISQF<br>CKEKGVFYMPGVMTPTLVKAMKLGHDILKLFPGEVVGPPQFVKAMK<br>GPFPNVKVVPTGGVNLDNVCKWFKAGVLAVGVGKALVKGKPDEVRE<br>KAKKFVKKIRGCTE<br>>B component<br>MQVQLQESGGGSVQAGGSLRLSCAASGYTDSRYCMAWFRQAPGK<br>EREWVARINSGRDITYYADSVKGRFTFSQDNAKNTVYLQMDSLEPED<br>TATYYCATDIPLRCRDIVAKGGDGFRYWGGGTQVTVSSGGSGGSGG<br>SNQHSHKDHETVRIAVVRARWHAEIVDACVSAFEAAMRDIGGDRFAV<br>DVFDVPGAYEIPHLARTLAETGRYGAVLGTAFVVNGGIYRHEFVASAV<br>INGMMNVQLNTGVPVLSAVLTPHNYDKSKAHTLLFLALFAVKGMEAA<br>RACVEILAAREKIAAGSHHHHHH |

**Supplemental Data Table 1** BAC sequences.
